# Supplementary material for: Quantifying acute kidney injury in an Ischaemia-Reperfusion Injury mouse model using deep-learning-based semantic segmentation in histology
Source: PubMed Central journal article supplement (PMC10537956; doi:10.1242/bio.059988), 2023-09-21
Supplement: biolopen-12-059988-s1.pdf [file biolopen-12-059988-s1.pdf]

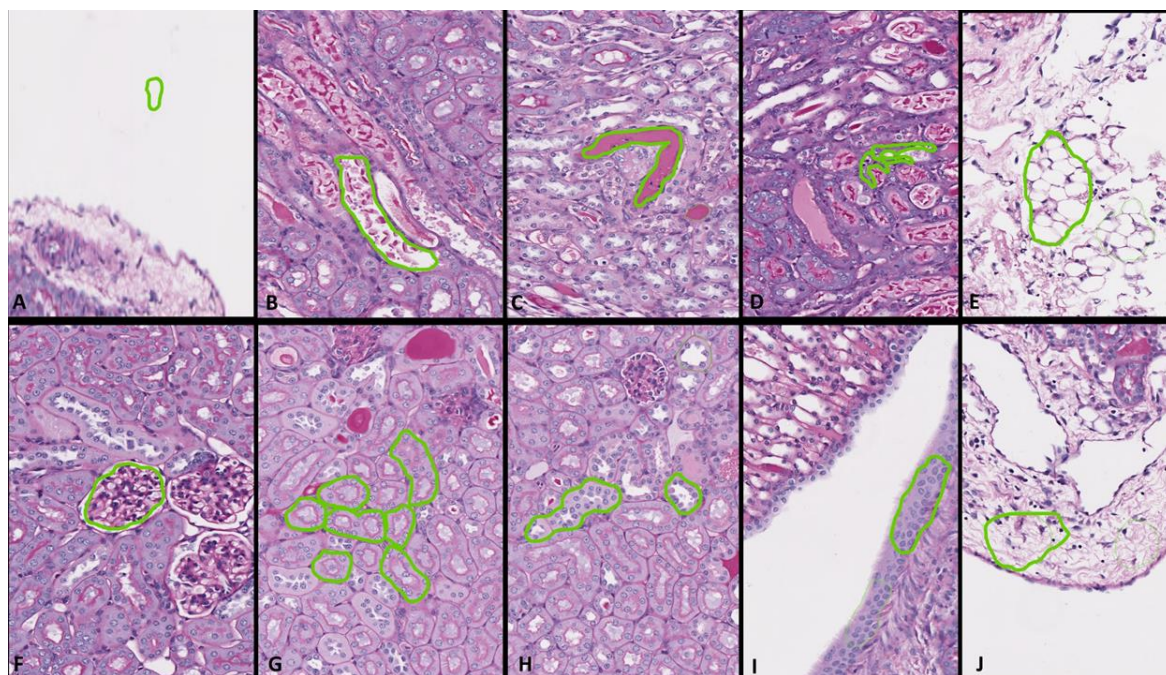

**Fig. S1. Annotation procedure:** A – Background, B – Tubular necrosis, C – Intratubular casts, D – Regenerating epithelium, E – Adipose tissue, F – Glomeruli, G – Proximal tubules, H – Distal tubules, I – Transitional epithelium, J – Stroma

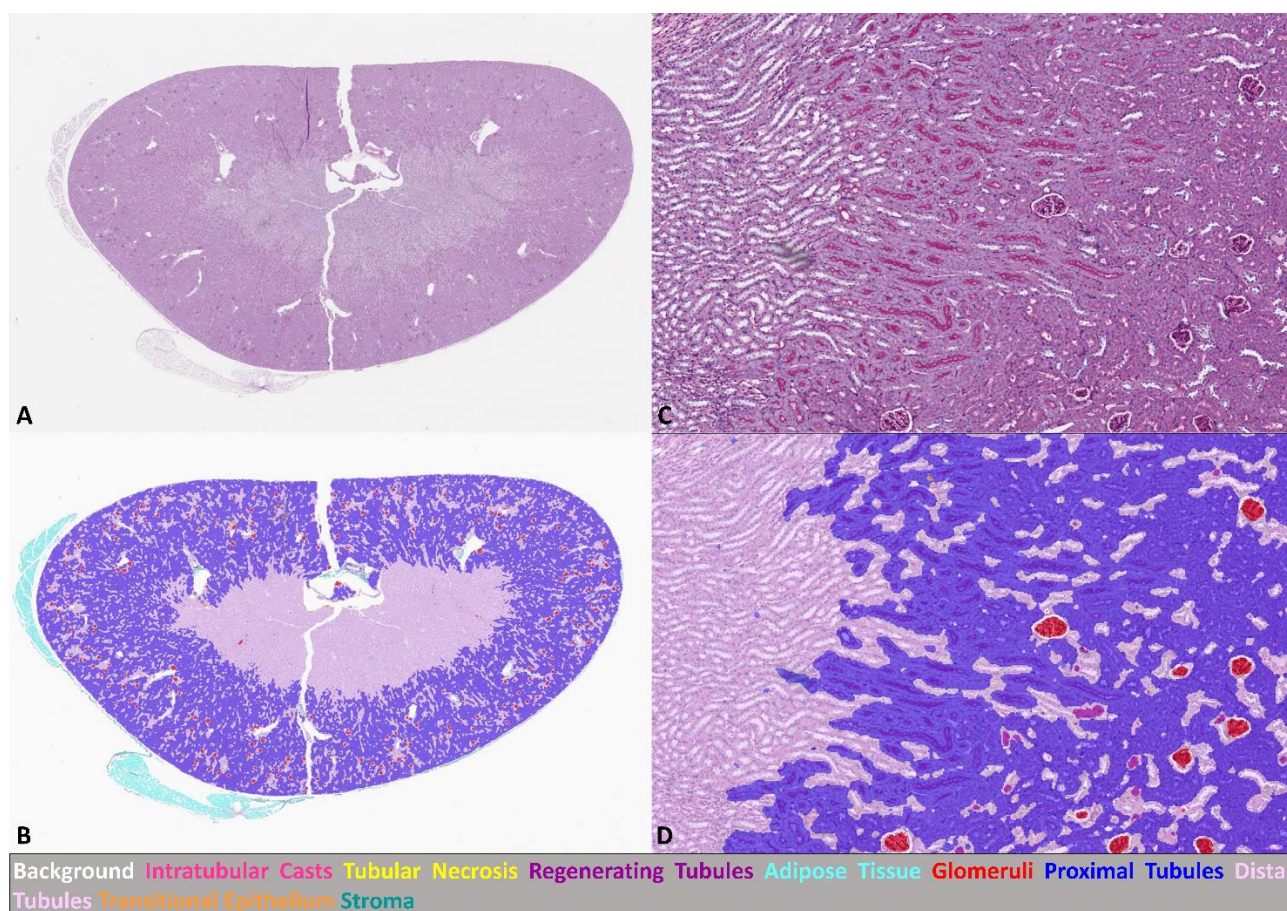

**Fig. S2.** Automated segmentation on WSI of a healthy murine kidney. (A) - full PAS stained WSI and its corresponding segmentation result (B); (C)- High magnification PAS stained WSI and its corresponding segmentation result (D).

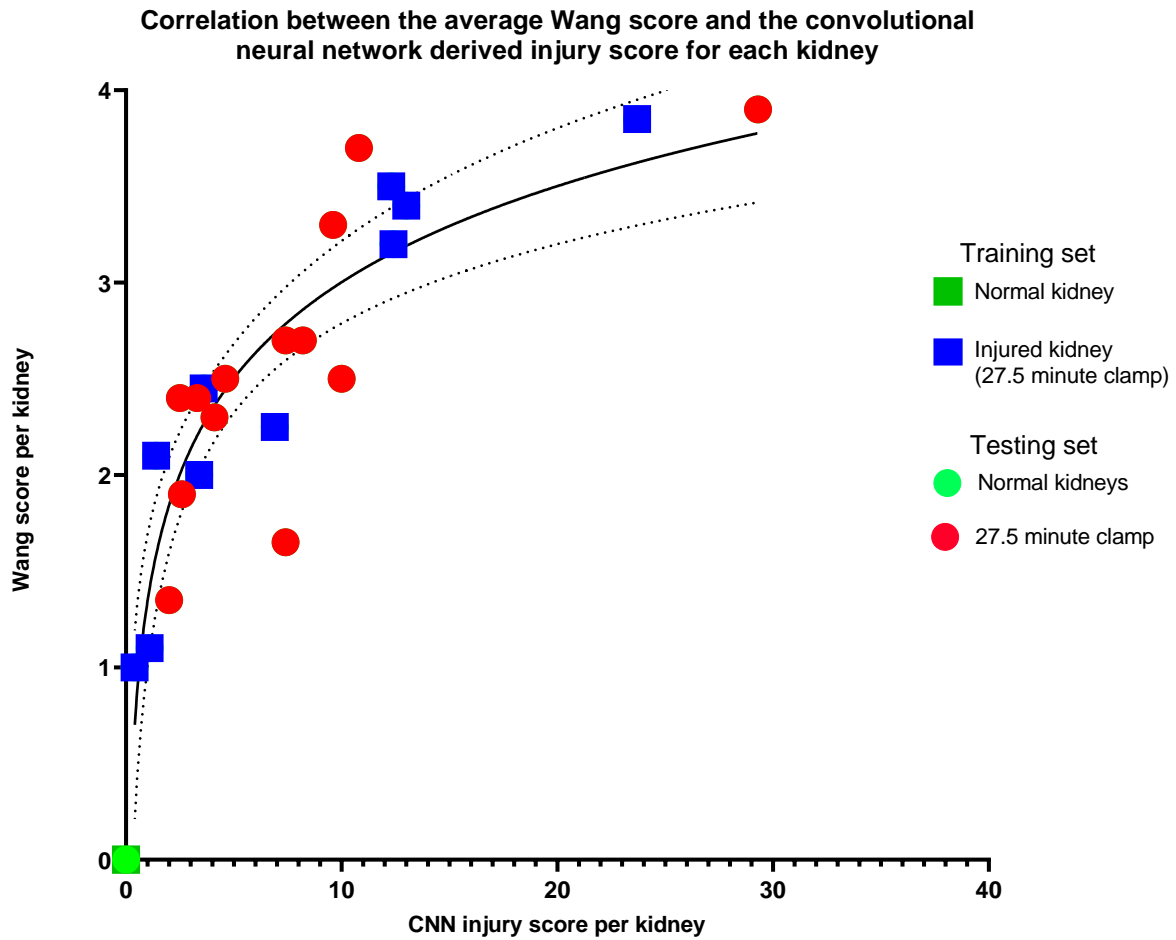

**Fig. S3.** Scatterplots visualising the correlation between the traditional scoring systems and CNN-based scoring per kidney. The conventional scoring method appears highly correlated to the CNN scoring, with the Spearman Correlation coefficient = 0.92 ( $p < 0.0001$ ).

**Training set: Correlation between the average Wang score and the convolutional neural network derived injury score for each kidney section**

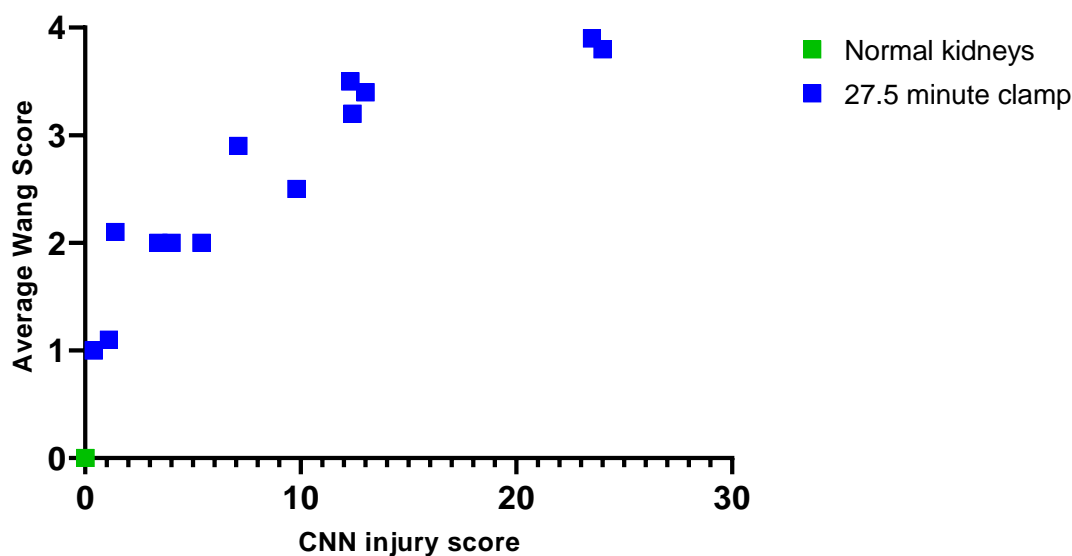

**Fig. S4.** Scatterplots visualising the correlation between the traditional scoring systems and CNN-based scoring per kidney section in the training set. The conventional scoring method appears highly correlated to the CNN scoring, with the Spearman Correlation coefficient = 0.95 ( $p < 0.0001$ ).

**Testing set: Correlation between the average Wang score and the convolutional neural network derived injury score for each kidney section**

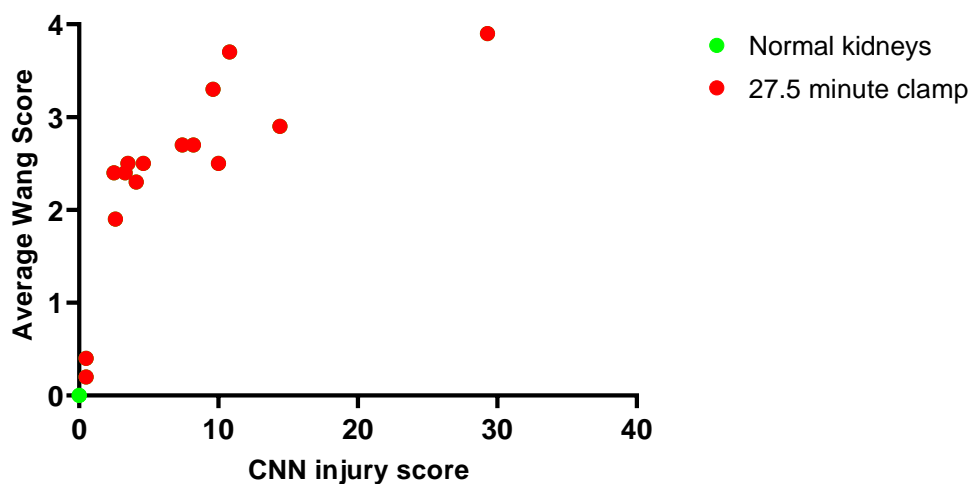

**Fig. S5.** Scatterplots visualising the correlation between the traditional scoring systems and CNN-based scoring per kidney section in the testing set. The conventional scoring method appears highly correlated to the CNN scoring, with the Spearman Correlation coefficient = 0.92 ( $p < 0.0001$ ).

**Table S1. Quantitative information on ground truth data**

| Class                           | Number of annotations | Number of pixels |
|---------------------------------|-----------------------|------------------|
| Background                      | 288                   | 76952097         |
| Intratubular casts              | 288                   | 2198198          |
| Tubular necrosis                | 288                   | 3033026          |
| Regenerating epithelium         | 288                   | 8459979          |
| Adipose tissue                  | 288                   | 3248413          |
| Glomeruli                       | 288                   | 3871080          |
| Proximal tubules                | 288                   | 3579512          |
| Distal tubules/Collecting ducts | 288                   | 3858445          |
| Transitional epithelium         | 288                   | 8275538          |
| Stroma                          | 288                   | 888184           |

**Table S2. IRI damage scorings (test + train) performed by the DL model and the pathologist**

| Case | DL (CNN score) | Pathologist score (Wang modified) |
|------|----------------|-----------------------------------|
| 1    | 1.10%          | 1.1                               |
| 2    | 4.00%          | 2                                 |
| 3    | 9.80%          | 2.5                               |
| 4    | 5.40%          | 2                                 |

|     |        |     |
|-----|--------|-----|
| 5   | 7.10%  | 2.9 |
| 6   | 23.50% | 3.9 |
| 7   | 24.00% | 3.8 |
| 8   | 13.00% | 3.4 |
| 9   | 12.40% | 3.2 |
| 10  | 3.40%  | 2   |
| 11  | 0.40%  | 1   |
| 12  | 1.40%  | 2.1 |
| 13* | 0.00%  | 0   |
| 14* | 0.00%  | 0   |
| 15  | 12.30% | 3.5 |
| 16  | 10.00% | 2.5 |
| 17  | 0.50%  | 0.4 |
| 18  | 14.40% | 2.9 |

|     |        |     |
|-----|--------|-----|
| 19  | 0.50%  | 0.2 |
| 20  | 3.50%  | 2.5 |
| 21  | 2.50%  | 2.4 |
| 22  | 4.60%  | 2.5 |
| 23  | 8.20%  | 2.7 |
| 24  | 2.60%  | 1.9 |
| 25  | 7.40%  | 2.7 |
| 26  | 9.60%  | 3.3 |
| 27  | 3.30%  | 2.4 |
| 28  | 10.80% | 3.7 |
| 29  | 29.30% | 3.9 |
| 30  | 4.10%  | 2.3 |
| 31* | 0.00%  | 0   |

Cases marked with an \* - 2 sections per slide, scores represent the average of those 2 consecutive sections

**Table S3. Overall model statistics**

|                         |      |
|-------------------------|------|
| Mean Precision          | 0.85 |
| Mean True Positive Rate | 0.82 |
| Mean Specificity        | 1    |
| Mean F1                 | 0.80 |

**Table S4. Accuracy parameters for CNN performance on the training set**

| Accuracy Parameter                     |           |                    |             |      |
|----------------------------------------|-----------|--------------------|-------------|------|
| Class of interest                      | Precision | True positive rate | Specificity | F1   |
| <i>Background</i>                      | 1.00      | 0.97               | 1.00        | 0.98 |
| <i>Intratubular casts</i>              | 0.84      | 0.87               | 0.99        | 0.85 |
| <i>Tubular necrosis</i>                | 0.99      | 0.84               | 1.00        | 0.91 |
| <i>Regenerating epithelium</i>         | 0.71      | 0.46               | 1.00        | 0.56 |
| <i>Adipose tissue</i>                  | 0.90      | 0.91               | 0.97        | 0.91 |
| <i>Glomeruli</i>                       | 0.99      | 0.91               | 1.00        | 0.95 |
| <i>Proximal tubules</i>                | 0.99      | 0.85               | 1.00        | 0.92 |
| <i>Distal tubules/Collecting ducts</i> | 0.77      | 0.91               | 0.96        | 0.83 |
| <i>Transitional epithelium</i>         | 0.94      | 0.94               | 1.00        | 0.94 |
| <i>Stroma</i>                          | 0.72      | 0.96               | 0.95        | 0.83 |
